# Supplementary material for: Remdesivir in treating hospitalized patients with COVID-19: A renewed review of clinical trials
Source: Front Pharmacol. 2022 Sep 8;13:971890. doi: 10.3389/fphar.2022.971890 (PMC9493488; doi:10.3389/fphar.2022.971890)
Supplement: Supplementary file 1 [file Table1.XLSX]

## Sheet: Sheet1
Table 1 Adverse Events in RCTs
Adverse Events		Cao [18]								ACTT-1 [19]				ACTT-2 [20]				First SIMPLE trial [21]						Second SIMPLE trial [22]						Florence Ader [26]				R.L. Gottlieb [27]
		Remdesivir group (n=155)				Placebo group (n=78)				Remdesivir group (n = 532)		Placebo group (n = 516)		Baricitinib + RDV (n = 507)		Placebo + RDV (n = 509)		5-Day Group (n = 200)			10-Day Group (n = 197)			10-Day remdesivir (n = 193)		5-Day remdesivir (n = 191)		Standard care (n = 200)		Remdesivir+standard of care (n=429)		Standard of care (n=428)		Remdesivir group（n=279）		Placebo group (n=283)		Incidence of AEs
		Any grade	Grade 3 or 4	SAE	Grade 3 or 4	Any grade	Grade 3 or 4	SAE	Grade 3 or 4	Any grade	SAE	Any grade	SAE	Any grade	SAE	Any grade	SAE	Any grade	grade 3 or 4	SAE	Any grade	grade 3 or 4	SAE	Any grade	grade 3 or 4	Any grade	grade 3 or 4	Any grade	grade 3 or 4	Any grade	SAE	Any grade	SAE	Any grade	SAE	Any grade	SAE	With Remdesivir	With non-Remdesivir
Systematic AEs	Hypoalbuminaemia	20 (13%)	0			12 (15%)	1 (1%)			6 (1.1)		7 (1.4)																										26/687 (3.78%)	19/594 (3.20%)
	Blood albumin decreased									7 (1.3)		4 (0.8)		5 (1.0)		3 (0.6)																						15/1548 (0.1%)	4/516 (0.78%)
	Hypokalaemia	18 (12%)	2 (1%)			11 (14%)	1 (1%)											10 (5)			12 (6)			13 (7)		10 (5)		4 (2)										63/936 (6.73%)	15/278 (5.40%)
	Hyperglycaemia									34 (6.4)		34 (6.6)		25 (4.9)		40 (7.9)																						99/1548 (6.41%)	34/516 (6.59%)
	Increased blood glucose	11 (7%)	0			6 (8%)	0			39 (7.3)		27 (5.2)		22 (4.3)		27 (5.3)																						99/1563 (6.33%)	33/594 (5.56%)
	Anaemia	18 (12%)	1 (1%)			12 (15%)	2 (3%)			42 (7.9)		52 (10.1)		24 (4.7)		31 (6.1)																						115/1663 (6.92%）	64/594 (10.77%)
	Rash	11 (7%)	0			2 (3%)	0																															11/155 (7.10%)	2/78 (2.56%)
	Thrombocytopenia	16 (10%)	4 (3%)	1 (1%)	1(1%)	5 (6%)	3 (4%)	0	0																													17/155 (11.0%)	5/78 (6.41%)
	Hyperlipidaemia	10 (6%)	0			8 (10%)	0																															10/155 (6.45%)	8/78 (10.26%)
	Increased white blood cell count	11 (7%)	0			6 (8%)	0																															11/155 (7.10%)	6/78 (7.69%)
	Increased neutrophil	10 (6%)	0			4 (5%)	0																															10/155 (6.45%)	4/78 (5.13%)
	Reduced serum sodium	4 (3%)	0			2 (3%)	0																															4/155 (2.58%)	2/78 (2.56%)
	Hypernatraemia									4 (0.8)		4 (0.8)																										4/532 (0.75%)	4/516 (0.78%)
	Increased serum potassium	4 (3%)	2 (1%)			1 (1%)	0																															4/155 (2.58%)	4/516 (0.78%)
	Lymphopenia									13 (2.4)		30 (5.8)		11 (2.2)		23 (4.5)																						47/1548 (3.04%)	30/516 (5.81%)
	Pyrexia									38 (7.1)		32 (6.2)		10 (2.0)		9 (1.8)																		1 (0.4)		11 (3.9)		58/1827 (3.17%)	43/799 (5.38%)
	Bacteraemia									0 (-)		10 (1.9)		2 (0.4)		5 (1.0)																						7/1548 (0.45%)	10/516 (1.94%)
	Sepsis									4 (0.8)		4 (0.8)		3 (0.6)	1 (0.2)	7 (1.4)	5 (1.0)														6 (1%)		6 (1%)					26/1977 (1.32%）	10/944 (1.06%)
	Septic shock			1 (1%)	0			1(1%)	1(1%)	3 (0.6)	8 (1.5)	3 (0.6)	15 (2.9)	3 (0.6)	4 (0.8)	2 (0.4)	8 (1.6)			2 (1)			5 (3)															36/2100 (1.71%)	19/594 (3.20%）
	Shock										5 (0.9)		4 (0.8)		2 (0.4)		4 (0.8)																					11/1548 (7.11%)	4/516 (0.78%)
	Lymphocyte count decreased									44 (8.3)		54 (10.5)		23 (4.5)		35 (6.9)																						102/1548 (6.59%)	54/516 (10.47%)
	Prothrombin time prolonged									26 (4.9)		8 (1.6)		4 (0.8)		1 (0.2)																						31/1548 (2.00%)	8/516 (1.55%)
	Platelet count decreased									6 (1.1)		2 (0.4)																										6/532 (1.13%)	2/516 (0.39%)
	Alkalosis									3 (0.6)		3 (0.6)																										3/532 (0.56%)	3/516 (0.58%)
	Acidosis									8 (1.5)		5 (1.0)																										8/532 (1.50%)	5/516 (0.97%)
	Hypocalcaemia									3 (0.6)		2 (0.4)																										3/532 (0.56%)	2/516 (0.39%)
	Muscular weakness									3 (0.6)		2 (0.4)																										3/532 (0.56%)	2/516 (0.39%)
	Delirium									10 (1.9)		8 (1.6)																										10/532 (1.88%）	8/516 (1.55%）
	Mental status changes									2 (0.4)		4 (0.8)																										2/532 (0.38%)	4/516 (0.78%)
	Hypoxia									10 (1.9)	4 (0.8)	13 (2.5)	4 (0.8)	6 (1.2)	3 (0.6)	4 (0.8)	3 (0.6)				2 (1)		4 (2)															36/1745 (2.06%)	17/516 (3.29%)
	Hypotension									14 (2.6)	4 (0.8)	11 (2.1)	7 (1.4)	4 (0.8)	5 (1.0)	13 (2.6)	5 (1.0)	9 (4)			12 (6)																	66/1945 (3.39%)	18/516 (3.49%)
	Hypertension									23 (4.3)		20 (3.9)		11 (2.2)		6 (1.2)																						40/1548 (2.58%)	20/516 (3.88%)
	Insomnia																	10 (5)			11 (6)																	21/397 (5.29%)	0
	Multiple organ dysfunction syndrome			1 (1%)	0			2 (3%)	0		5 (0.9)		3 (0.6)		1 (0.2)		6 (1.2)																					13/1703 (0.76%)	5/594 (0.84%)
	International normalised ratio increased													3 (0.6)		8 (1.6)																						11/1016 (1.08%)	0
	Headache																							10 (5)		10 (5)		5 (3)						16 (5.7)		17 (6.0)		36/663 (5.43%)	22/483 (4.55%）
	Fatigue																																	10 (3.6)		11 (3.9)		10/279 (3.6%)	11/283 (3.9%)
	Chills																																	6 (2.2)		8 (2.8)		6/279 (2.2%)	8/283 (2.8%)
	Dizziness																																	5 (1.8)		10 (3.5)		5/279 (1.8%)	10/283 (3.5%)
	Haemoglobin decreased									48 (9.0)		62 (12.0)		30 (5.9)		30 (5.9)																						108/1548 (6.98%）	62/516 (12.02%)
Cardiovascular AEs	Atrial fibrillation									5 (0.9)	5 (0.9)	10 (1.9)	1 (0.2)	1 (0.2)		7 (1.4)																						18/1548 (1.16%)	11/516 (2.13%)
	Arrhythmia									4 (0.8)		1 (0.2)																			13 (3%)		6 (1%)					17/961 (1.77%)	7/944 (0.74%)
	Supraventricular tachycardia									3 (0.6)		2 (0.4)																										3/532 (0.56%)	2/516 (0.39%)
	Electrocardiogram QT prolonged									2 (0.4)		5 (1.0)																										2/532 (0.38%)	5/516 (0.97%)
	Troponin increased									1 (0.2)		5 (1.0)																										1/532 (0.19%)	5/516 (0.97%）
	Blood creatine phosphokinase increased									2 (0.4)		3 (0.6)																										2/532 (0.38%)	3/516 (0.58%)
	Deep vein thrombosis			1 (1%)	1(1%)			1 (1%)	1(1%)	8 (1.5)		14 (2.7)		11 (2.2)		9 (1.8)																						29/1703 (1.70%)	15/594 (2.53%)
	Thrombosis									3 (0.6)		4 (0.8)																										3/532 (0.56%)	4/516 (0.78%)
	Cardiopulmonary failure			8 (5%)	0			7 (9%)	1(1%)																													8/155 (5.16%)	7/78 (8.97%)
	Pulmonary embolism			1 (1%)	1(1%)			1(1%)	1(1%)																													1/155 (0.65%）	1/78 (1.28%）
	Cardiac arrest			1 (1%)	0			0	0		10 (1.9)		7 (1.4)		2 (0.4)		3 (0.6)																					16/1703 (0.94%)	7/594 (1.18%)
Respiratory AEs	Pneumonia									12 (2.3)		6 (1.2)		10 (2.0)	2 (0.4)	14 (2.8)	8 (1.6)																	2 (0.7)		8 (2.8)		38/1827 (1.53%)	14/799 (1.75%)
	Pneumonia bacterial									4 (0.8)		3 (0.6)		3 (0.6)		9 (1.8)																						16/1548 (1.03%)	3/516 (0.58%)
	Pneumonia staphylococcal									3 (0.6)		4 (0.8)																										3/532 (0.56%）	4/516 (0.78%）
	Pneumonia aspiration									4 (0.8)		2 (0.4)		4 (0.8)		2 (0.4)																						10/1548 (0.65%）	2/516 (0.39%)
	Oxygen saturation decreased									4 (0.8)		5 (1.0)																										4/532 (0.75%)	5/516 (0.97%)
	Respiratory distress									12 (2.3)	6 (1.1)	16 (3.1)	11 (2.1)	9 (1.8)	4 (0.8)	9 (1.8)	6 (1.2)			3 (2)			4 (2)															53/1946 (2.72%)	27/516 (5.23%)
	Dyspnea									9 (1.7)		6 (1.2)		3 (0.6)	1 (0.2)	3 (0.6)	4 (0.8)			4 (2)			1 (1)											7 (2.5)		15 (5.3)		32/2225 (1.44%)	21/799 (2.63%)
	Pneumothorax										5 (0.9)		5 (1.0)	3 (0.6)	1 (0.2)	2 (0.4)	4 (0.8)			2 (1)			3 (2)															20/1946 (1.03%)	5/516 (0.97%)
	Acute respiratory failure										8 (1.5)		14 (2.7)		18 (3.6)		13 (2.6)	12 (6)		10 (5)	21 (11)		18 (9)								30 (7%)		47 (11%)					130/2375 (5.47%)	61/944 (6.46%)
	Respiratory failure										39 (7.3)		66 (12.8)		26 (5.1)		37 (7.3)	7 (4)		5 (2)	14 (7)		10 (5)															138/1946 (7.09%)	66/516 (12.79%)
	Respiratory failure or acute respiratory distress syndrome			16 (10%)	4 (3%)			6 (8%)	4(5%)																						35 (9%)		37 (9%)					51/584 (8.73%)	43/506 (8.50%)
	Recurrence of COVID-19			1 (1%)	1(1%)			0	0		2 (0.4)		5 (1.0)																									3/687 (0.45%)	5/594 (0.84%)
	Viral pneumonia																			3 (2)			2 (1)															5/397 (1.26%)	0
	Pulmonary embolism										5 (0.9)		4 (0.8)		5 (1.0)		2 (0.4)														8 (2%)		11 (3%)					20/1977 (1.01%)	15/944 (1.59%)
	Cough																																	10 (3.6)		18 (6.4)		10/279 (3.6%)	18/283 (6.4%)
	Anosmia																																	9 (3.2)		6 (2.1)		9/279 (3.2%)	6/283 (2.1%)
	Acute respiratory distress syndrome										7 (1.3)		5 (1.0)		4 (0.8)		10 (2.0)			1 (<1)			5 (3)															27/1945 (1.39%)	5/516 (0.97%)
Urinary AEs	Increased blood urea nitrogen	10 (6%)	0			5 (6%)	0																															10/155 (6.45%)	5/78 (6.41%)
	Glomerular filtration rate decreased									55 (10.3)	5 (0.9)	74 (14.3)	2 (0.4)	49 (9.7)		42 (8.3)																						151/1548 (9.75%)	76/516 (14.73%)
	Blood creatinine increased									31 (5.8)		36 (7.0)		10 (2.0)		8 (1.6)			18/193 (10)			36/188 (19)																49/1548 (3.17%)	36/516 (6.98%)
	Creatinine renal clearance decreased									4 (0.8)		6 (1.2)		3 (0.6)		3 (0.6)								45/176 (26)	9/176 (5)	26/178 (15)	4/178 (2)	55/183 (30)	14/183 (8)									81/1902 (4.26%)	61/716 (8.52%)
	Acute kidney injury			1 (1%)	0			0	0	21 (3.9)	7 (1.3)	21 (4.1)	12 (2.3)	15 (3.0)	5 (1.0)	27 (5.3)	11 (2.2)	4 (2)			15 (8)										12（3%）		15 (4%)					114/2529 (4.51%)	48/1022 (4.70%)
	Renal failure													5 (1.0)		2 (0.4)															3 (1%)		5 (1%)					10/1445 (0.69%)	5/428 (1%)
Digestive AEs	Blood bilirubin increased									9 (1.7)		16 (3.1)		2 (0.4)		8 (1.6)			1/193 (1)		4/190 (3)																	23/1738 (1.32%)	16/516 (3.10%)
	Hyperbilirubinaemia	15 (10%)	1 (1%)			7 (9%)	0			2 (0.4)		3 (0.6)																										17/687 (2.47%)	10/594 (1.68%)
	Aspartate aminotransferase increased	7 (5%)	0			9 (12%)	0			18 (3.4)		33 (6.4)		9 (1.8)		16 (3.1)		10 (5)	14/194 (8)		13 (7)	11/190 (6)		56/175 (32)	2/175 (1)	56/177 (32)	4/177 (3)	60/182 (33)	11/182 (6)									189/2452 (7.61%)	102/776 (13.14%)
	Alanine aminotransferase increased									12 (2.3)		24 (4.7)		6 (1.2)		9 (1.8)		11 (6)	12/194 (6)		15 (8)	16/191 (9)		57/177 (32)	6/177 (3)	61/179 (34)	4/179 (2)	71/182 (39)	14/182（8）									171/2301 (7.43%)	95/716 (13.27%)
	Transaminases increased									7 (1.3)		11 (2.1)		6 (1.2)		10 (2.0)															11 (3%)		3 (1%)					34/1977 (1.72%)	14/944 (1.48%)
	Constipation	21 (14%)	0			12 (15%)	0											13 (6)			13 (7)																	47/552 (8.51%)	12/78 (15.38%)
	Nausea	8 (5%)	0			2 (3%)	0											20 (10)			17 (9)			18 (9)		19 (10)		6 (3)						30 (10.8)		21 (7.4)		112/1215 (9.23%)	29/561 (5.17%)
	Diarrhoea	5 (3%)	0			2 (3%)	0																	10 (5)		12 (6)		14 (7)						11 (3.9)		11 (3.9)		38/818 (4.65%)	27/561 (4.81%)
	Vomiting	4 (3%)	0			2 (3%)	0																															4/155 (2.58%)	2/78 (2.56%)
	Liver function test increased									3 (0.6)		3 (0.6)																										3/532 (0.56%)	3/516 (0.58%)
	Haemorrhage of lower digestive tract			1 (1%)	1(1%)			0	0																													1/155 (0.65%)	0
	Ageusia																																	8 (2.9)		7 (2.5)		8/279 (2.9%)	7/283 (2.5%)
	Aminotransferase levels increased																			3 (2)			2 (1)															5/397 (1.26%)	0
